# Supplementary material for: In vivo mapping and assay of matrix metalloproteases for liver tumor diagnosis
Source: Royal Society of Chemistry journal article supplement (doi:10.1039/c5ra26172d), 2016-01-01
Supplement: c5ra26172d1.pdf [file c5ra26172d1.pdf]

## Supplementary Information

for

### *In Vivo* Mapping and Assay of Matrix Metalloproteases for the Liver Tumor Diagnosis

Yufeng Chen<sup>a,†</sup>, Jin Hong<sup>b,†</sup>, Dongyan Wu<sup>a</sup>, Yingying Zhou<sup>a</sup>, Mathew D'Ortenzio<sup>c</sup>, Ya Ding<sup>a,\*</sup>,  
Xinghua Xia<sup>d</sup>

<sup>a</sup> Key Laboratory of Drug Quality Control and Pharmacovigilance, China Pharmaceutical University, Ministry of Education, Nanjing 210009, China.

<sup>b</sup> Key Laboratory of Biomedical Functional Materials, School of Sciences, China Pharmaceutical University, 639 Longmian Avenue, Nanjing 211198, China.

<sup>c</sup> University of Waterloo, 200 University Avenue West, Waterloo, ON N2L 3G1, Canada.

<sup>d</sup> Key Lab of Analytical Chemistry for Life Science, School of Chemistry and Chemical Engineering, Nanjing University, Nanjing 210093, China.

<sup>†</sup> The first two authors contributed equally to this work.

Corresponding Author: Ya Ding, Associate Professor, PhD, Email: [ayanju@163.com](mailto:ayanju@163.com).

#### Materials and Methods

Preparation process and optimization of GNP-p-FITC conjugate

**Preparation of GNPs.** GNPs were synthesized in a single-phase system by filtering sub-boiling water through a microporous membrane with an aperture of 0.22  $\mu\text{m}$ . All glassware was cleaned in a bath of freshly prepared aqua regia and rinsed thoroughly with deionized water prior to use.  $\text{HAuCl}_4 \cdot 3\text{H}_2\text{O}$  (0.615 mL, 0.02 g/mL) and solid sodium citrate (50 mg, 1.3 mmol) were dissolved in 50 mL deionized  $\text{H}_2\text{O}$ . A freshly prepared and cooled aqueous solution of sodium borohydride (25

mL, 0.04 mg/mL) was added to the reaction solution, stirring for 30 min, the resulting solution appeared as a claret red colloidal dispersion of gold. The concentration of the GNPs stock solution was  $1.176 \times 10^{-4}$  g/mL (The concentration of GNPs was expressed in the concentration of gold.).

#### Optimization of GNP-p-FITC conjugate

***The amount of p-FITC is constant.*** Various volumes of GNPs stock solution were added to different samples of p-FITC stock solution (1  $\mu\text{g/mL}$ ), to a volume of 180  $\mu\text{L}$ . After the solutions were completely mixed, deionized  $\text{H}_2\text{O}$  was added to make the total volume 3 mL. The concentration of p-FITC was fixed at 60 ng/mL. The final concentrations of GNPs were in the range from  $3.92 \times 10^{-5}$  to 98.0  $\mu\text{g/mL}$ . The mixtures were stirred for 30 min in darkness and the fluorescence intensity of the samples, at room temperature, were measured at  $\lambda_{\text{ex/em}} = 494/518$  nm.

***The amount of GNPs is constant.*** Various volumes of p-FITC stock solution were added to different samples of GNPs stock solution, to a volume of 1 mL. After the solutions were completely mixed, deionized  $\text{H}_2\text{O}$  was added to make the total volume 3 mL. The concentration of GNPs was fixed at 39.20  $\mu\text{g/mL}$ . The final concentrations of p-FITC were in the range from 1 to 90 ng/mL. The mixtures were stirred for 30 min in the dark and the fluorescence intensity of the samples, at room temperature, were measured at  $\lambda_{\text{ex/em}} = 494/518$  nm.

***The ratio of GNPs: p-FITC is constant.*** Samples of different concentration of GNPs (27.44 ~ 50.96  $\mu\text{g/mL}$ ) were mixed with different concentration of p-FITC (35 ~ 65 ng/mL), with a fixed optimal ratio of GNPs to p-FITC (39.20  $\mu\text{g/mL}$ : 50 ng/mL). Deionized  $\text{H}_2\text{O}$  was added to make the total volume 3 mL. The mixtures were stirred for 30 min in the dark and the fluorescence intensity of the samples, at room temperature, were measured at  $\lambda_{\text{ex/em}} = 494/518$  nm.

#### Enzymatic hydrolysis experiments

***Enzymatic reaction concentration.*** Different samples of GNP-p-FITC/mPEG conjugate containing p-FITC 10 ng were redispersed into 3 mL PBS (0.03 M, pH=7.4). One was for direct fluorescence measurement, while the other six samples had different amounts of collagenase IV added. The final concentrations of collagenase IV were from 0 to 5.6 mg/mL. The fluorescence intensity with a fixed reaction time of 15 min, while in incubation at 37 °C, was measured.

**Enzymatic reaction time.** GNP-p-FITC/mPEG conjugate containing p-FITC 10 ng was redispersed into 3 mL of PBS (0.03 M, pH=7.4), followed by the addition of 7.2 mg collagenase IV. The final concentration of collagenase IV was 2.4 mg/mL. The mixture was incubated at 37 °C. The fluorescence intensity as a function of time (from 0 to 60 mins) was monitored.

**Fluorescence recovery by collagenase IV versus GSH.** GNP-p-FITC/mPEG conjugate samples containing p-FITC 10 ng were redispersed into 3 mL of PBS (0.03 M, pH=7.4) containing 2 μM GSH, 10 mM GSH, and 2.4 mg/mL collagenase IV, respectively. The mixture was incubated at 37 °C. The fluorescence intensity as a function of time was monitored.

Additional results and discussion:

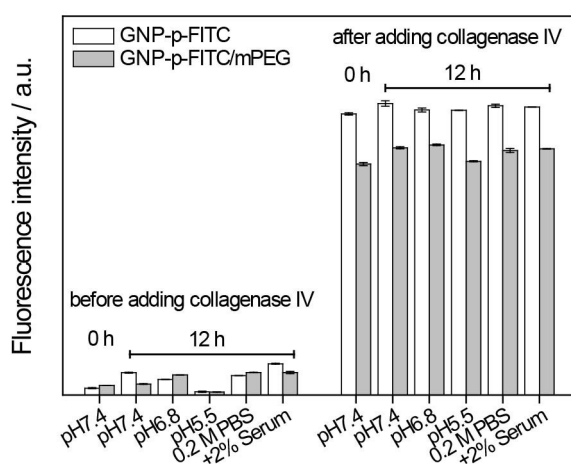

**Figure S1.** Stability and fluorescence recovery of GNP-p-FITC and GNP-p-FITC/mPEG conjugates after the incubation for 12 h at 37°C in the following environments: 0.03 M PBS at pH 7.4, pH 6.8, pH 5.5, 0.2 M PBS at pH 7.4, and 0.03 M PBS at pH 7.4 with 2% serum. The result was compared to the freshly prepared GNP-p-FITC and GNP-p-FITC/mPEG conjugates solution in 0.03 M PBS at pH 7.4. The concentration of collagenase IV was 2.4 mg/mL and the fluorescence recovery intensity was detected after the addition of collagenase IV for 5 min.
